# Supplementary material for: Structural Characterization and Assessment of Anti-Inflammatory Activities of Polyphenols and Depsidone Derivatives from Melastoma malabathricum subsp. normale
Source: MDPI journal article supplement (doi:10.3390/molecules27051521), 2022-02-24
Supplement: s1 [file s1]

## *Supplementary data*

### **Structural characterization and assessment of anti-inflammatory activities of polyphenols and depsidone derivatives from *Melastoma malabathricum subsp. normale***

Rui-Jie He <sup>1</sup>, Ya-Feng Wang <sup>1</sup>, Bing-Yuan Yang <sup>1</sup>, Zhang-Bin Liu <sup>1</sup>, Dian-Peng Li <sup>1</sup>,  
Bi-Qun Zou<sup>2,\*</sup>, Yong-Lin Huang <sup>1,\*</sup>

\*Correspondence: zoubiqun@163.com (B.-Q. Zou); hyl@gxib.cn(Y.-L.H.); Tel.: +86-773-355-0829; Fax: +86-773-355-0067

Figure S1. <sup>1</sup>H NMR (500 MHz, Acetone-*d*<sub>6</sub>) spectrum of **1**

Figure S2. <sup>13</sup>C NMR (125 MHz, Acetone-*d*<sub>6</sub>) spectrum of **1**

Figure S3. HSQC spectrum of **1** in Acetone-*d*<sub>6</sub>

Figure S4. HMBC spectrum of **1** in Acetone-*d*<sub>6</sub>

Figure S5. <sup>1</sup>H-<sup>1</sup>H COSY spectrum of **1** in Acetone-*d*<sub>6</sub>

Figure S6. Roesy spectrum of **1** in Acetone-*d*<sub>6</sub>

Figure S7. HR-ESI-MS spectrum of **1**

Figure S8. CD spectrum of **1**

Figure S9. The <sup>1</sup>H NMR spectrum of **11** (500 MHz, DMSO-*d*<sub>6</sub>)

Figure S10. The <sup>13</sup>C NMR spectrum of **11** (125 MHz, DMSO-*d*<sub>6</sub>)

Figure S11. The HSQC spectrum of **11** (500 MHz, DMSO-*d*<sub>6</sub>)

Figure S12. The HMBC spectrum of **11** (500 MHz, DMSO-*d*<sub>6</sub>)

Figure S13. The HR-ESI-MS spectrum of **11**

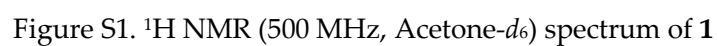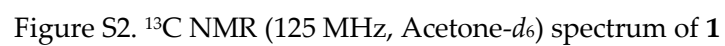

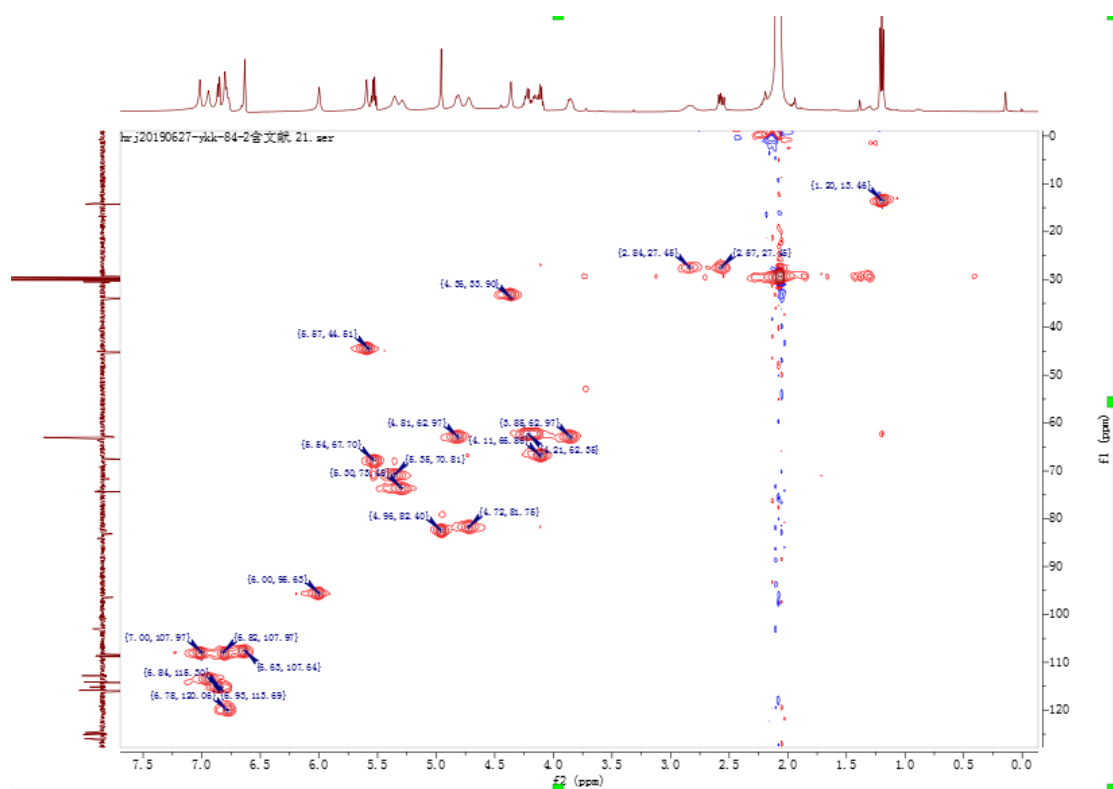

Figure S3. HSQC spectrum of **1** in Acetone- $d_6$

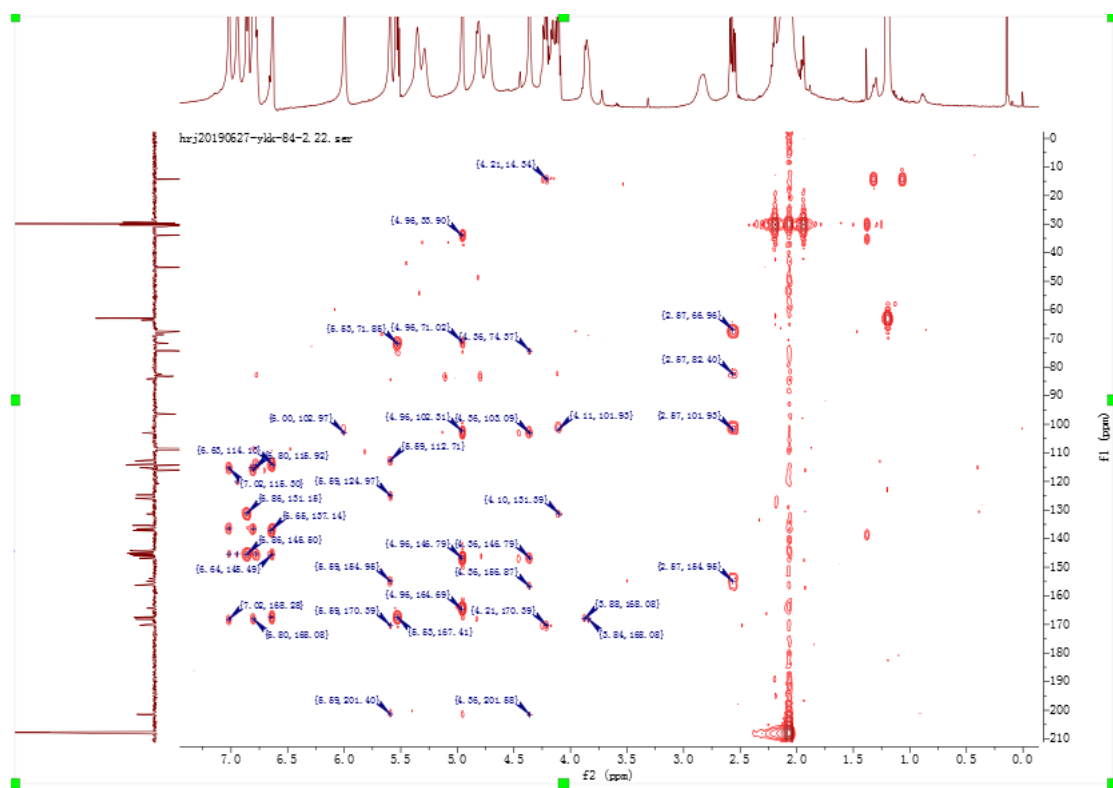

Figure S4. HMBC spectrum of **1** in Acetone- $d_6$

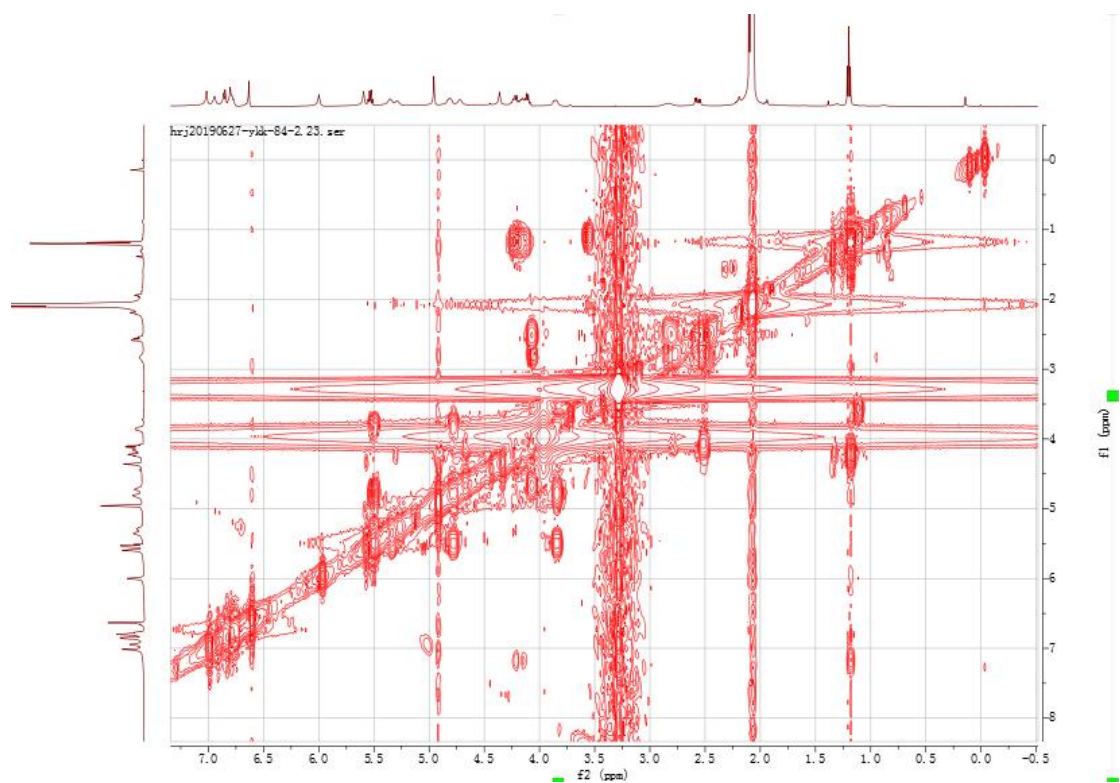

Figure S5.  $^1\text{H}$ - $^1\text{H}$  COSY spectrum of **1** in Acetone- $d_6$

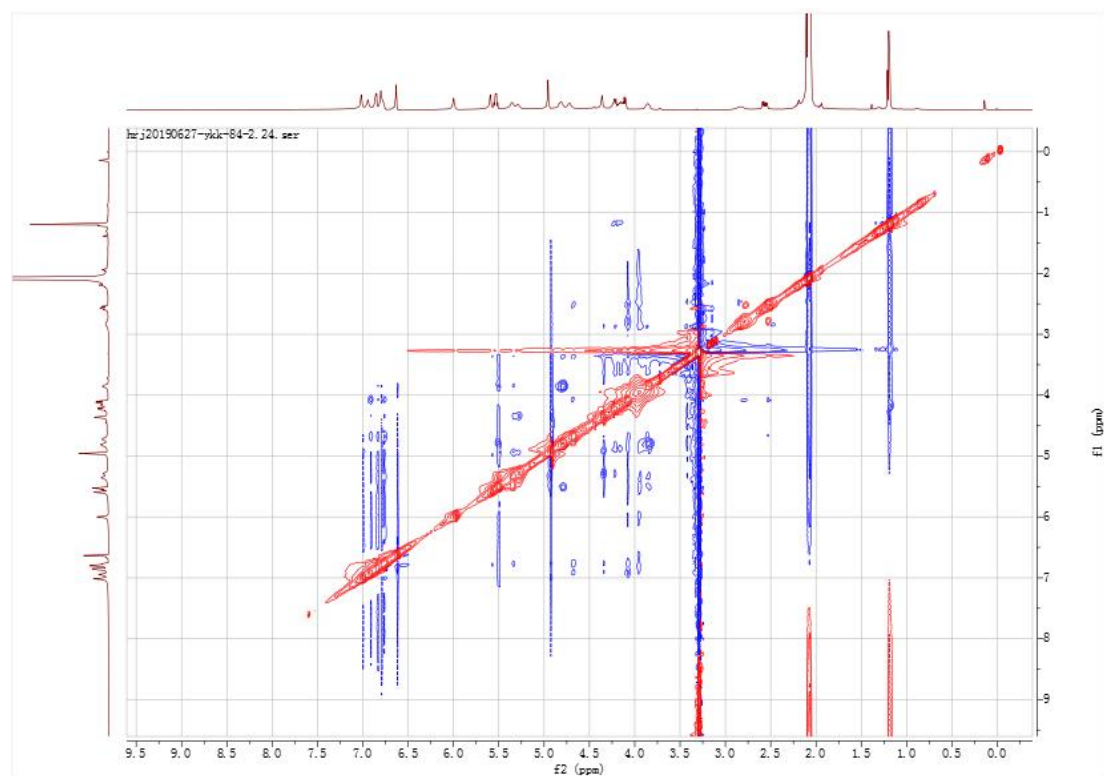

Figure S6. Roesy spectrum of **1** in Acetone- $d_6$

| Elmt | Val. | Min | Max | Elmt | Val. | Min | Max | Use Adduct |
|------|------|-----|-----|------|------|-----|-----|------------|
| H    | 1    | 1   | 100 | O    | 2    | 0   | 100 | H          |
| C    | 4    | 1   | 100 |      |      |     |     |            |
| N    | 3    | 0   | 0   |      |      |     |     |            |

Error Margin (ppm): 10  
 HC Ratio: 0.1 - 4.0  
 Max Isotopes: all  
 MSn Iso RI (%): 75.00

DBE Range: 1.0 - 50.0  
 Apply N Rule: yes  
 Isotope RI (%): 1.00  
 MSn Logic Mode: AND

Electron Ions: both  
 Use MSn Info: no  
 Isotope Res: 10000  
 Max Results: 500

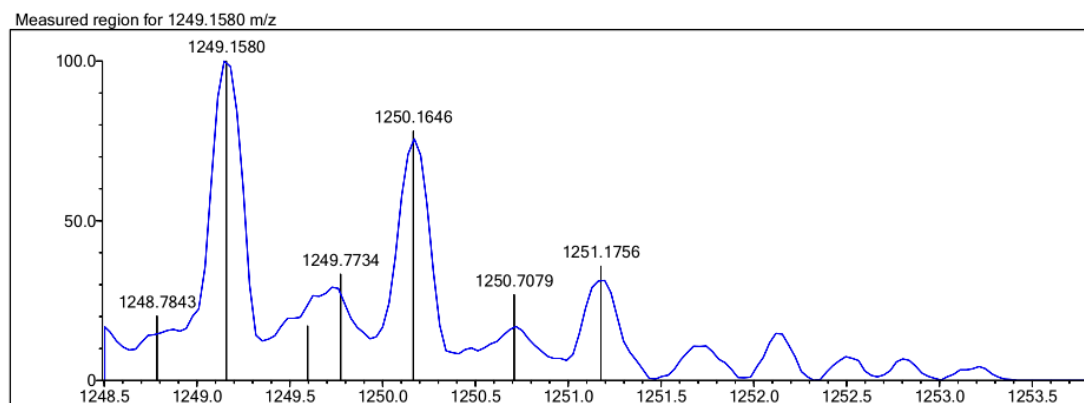

| Rank | Score | Formula (M) | Ion                | Meas. m/z | Pred. m/z | DBE  | Df. (ppm) | Iso   | Meas. (M) |
|------|-------|-------------|--------------------|-----------|-----------|------|-----------|-------|-----------|
| 2    | 42.26 | C58 H42 O32 | [M-H] <sup>-</sup> | 1249.1580 | 1249.1586 | 38.0 | -0.48     | 42.26 | 1250.1653 |

Figure S7. HR-ESI-MS spectrum of **1**

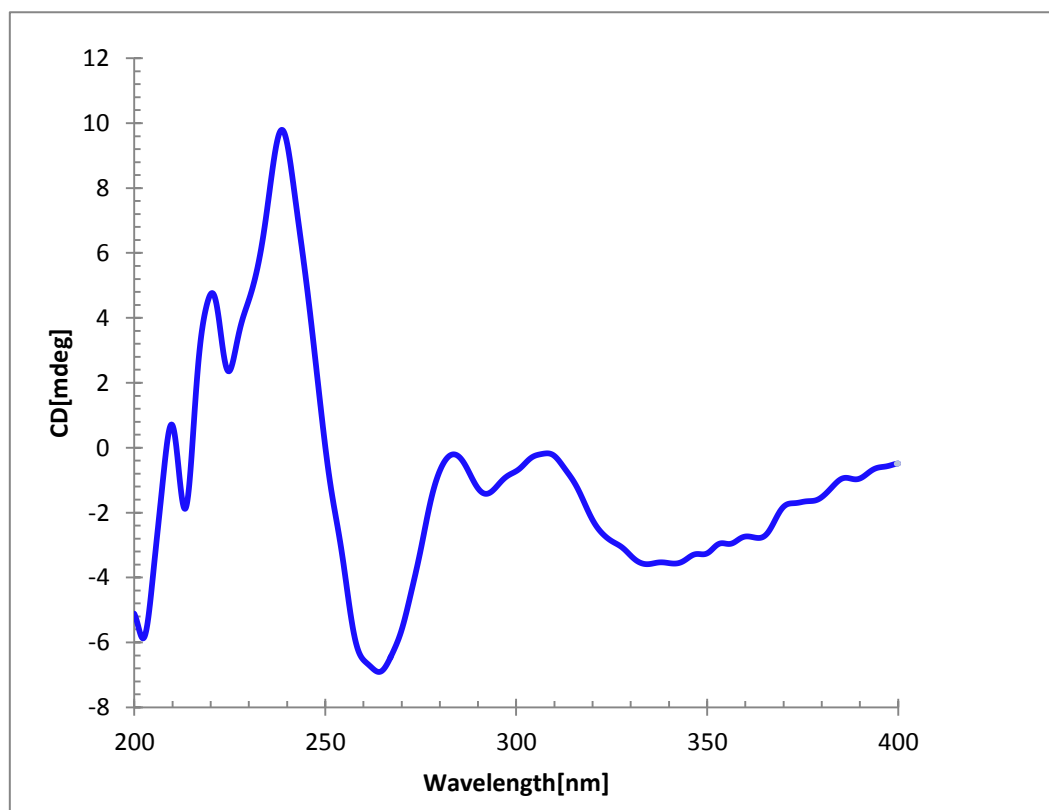

Figure S8. CD spectrum of **1**

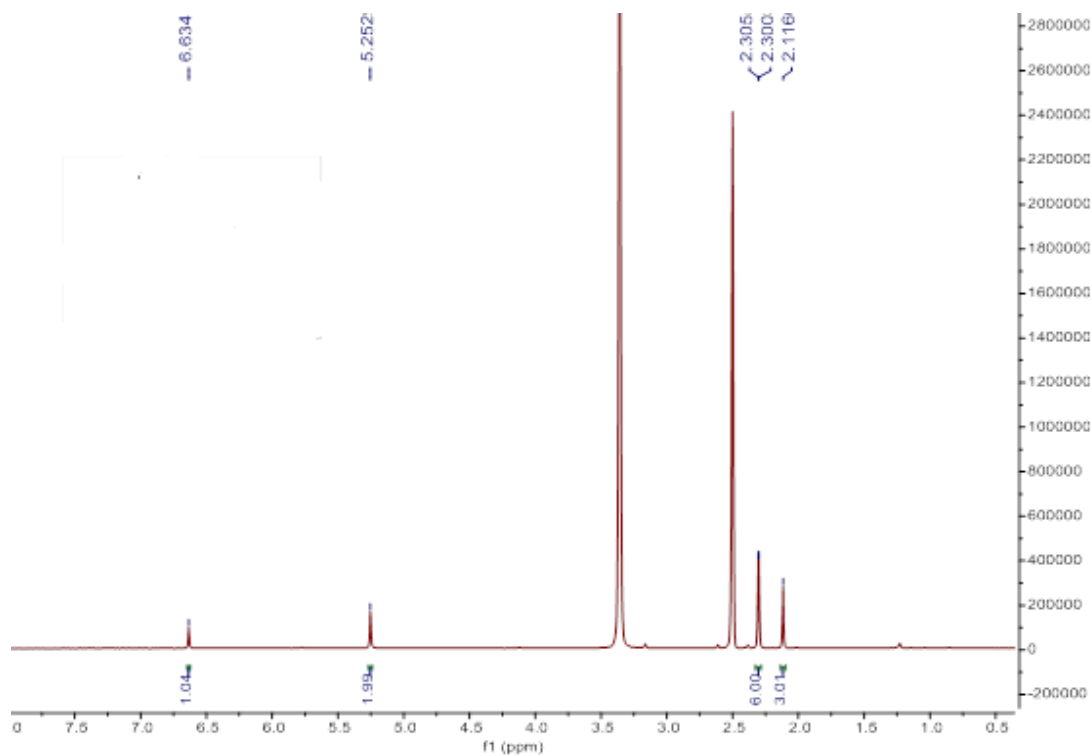

**Figure S9** The  $^1\text{H}$  NMR spectrum of **11** (500 MHz,  $\text{DMSO-}d_6$ )

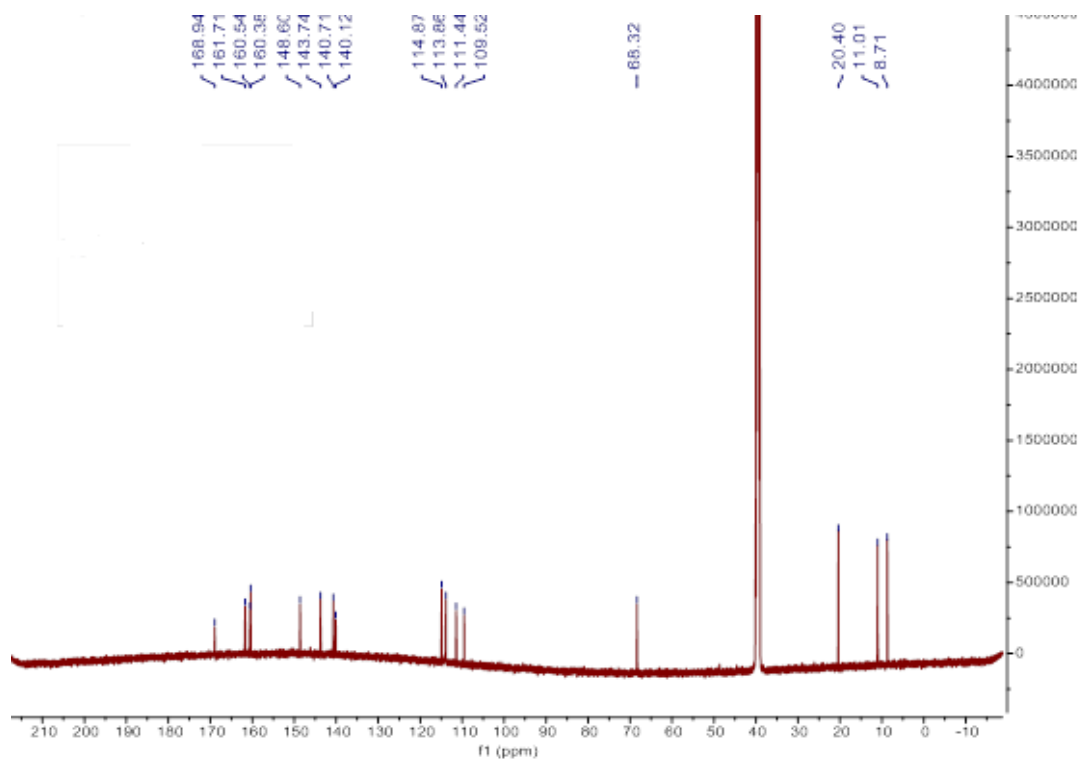

**Figure S10** The  $^{13}\text{C}$  NMR spectrum of **11** (125 MHz,  $\text{DMSO-}d_6$ )

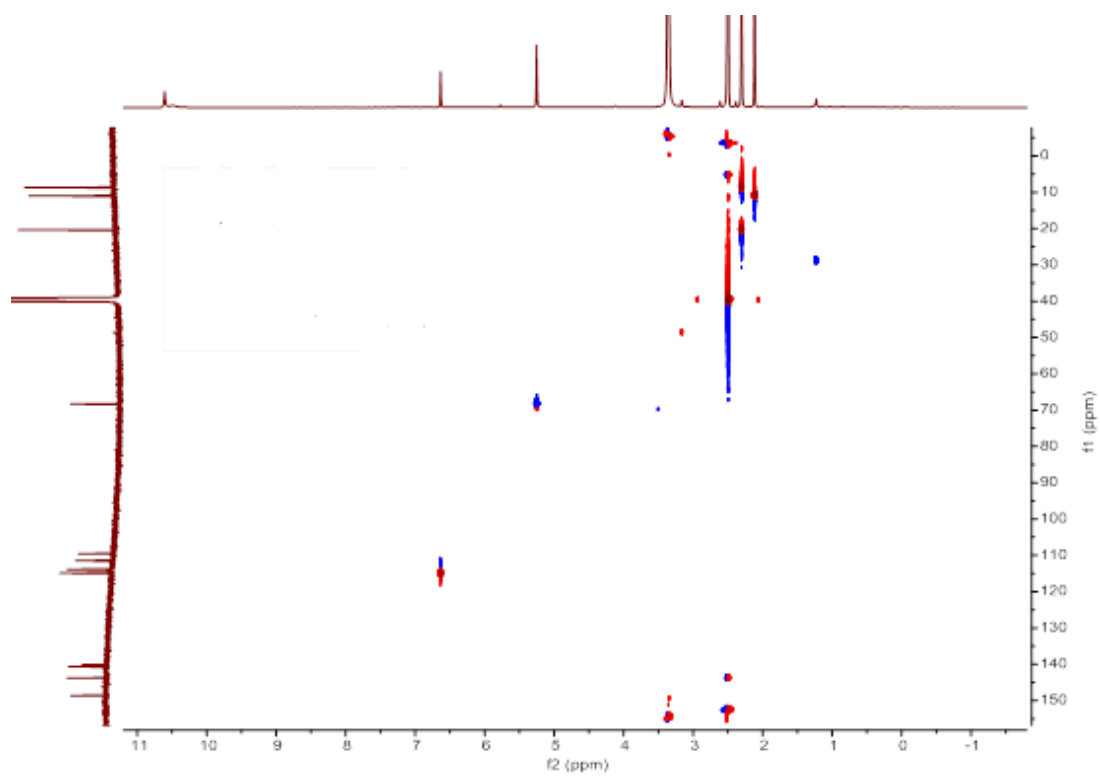

**Figure S11** The HSQC spectrum of **11** (500 MHz, DMSO-*d*<sub>6</sub>)

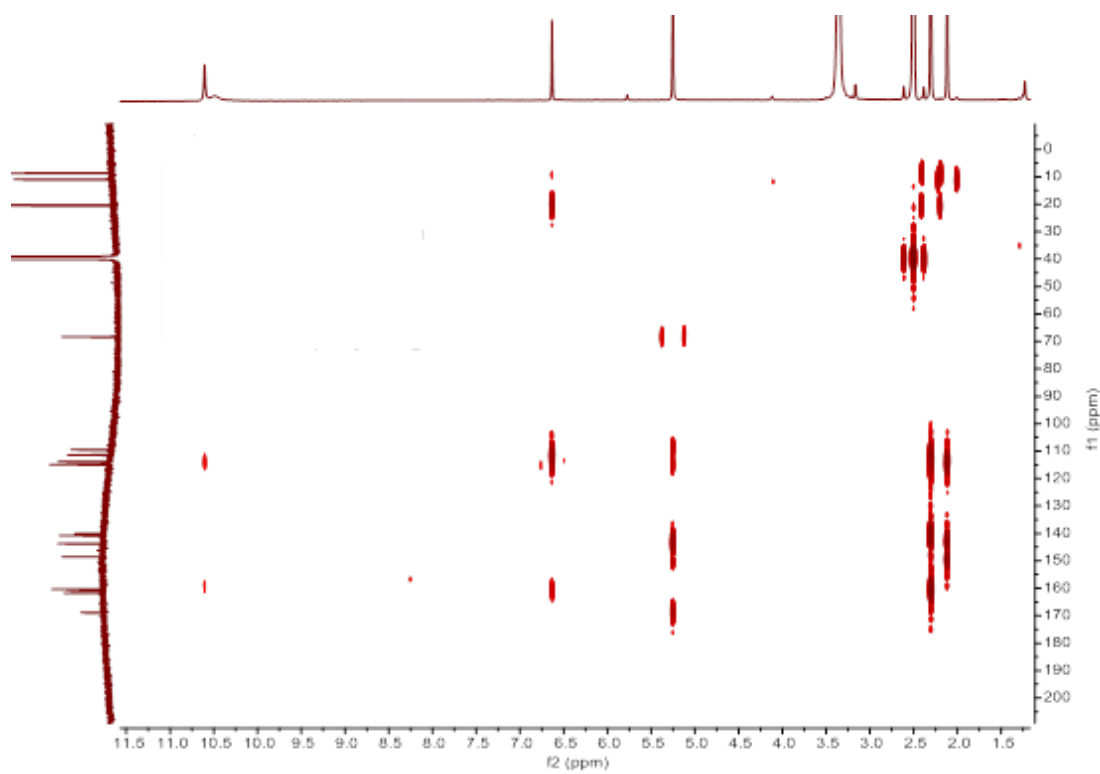

**Figure S12** The HMBC spectrum of **11** (500 MHz, DMSO-*d*<sub>6</sub>)

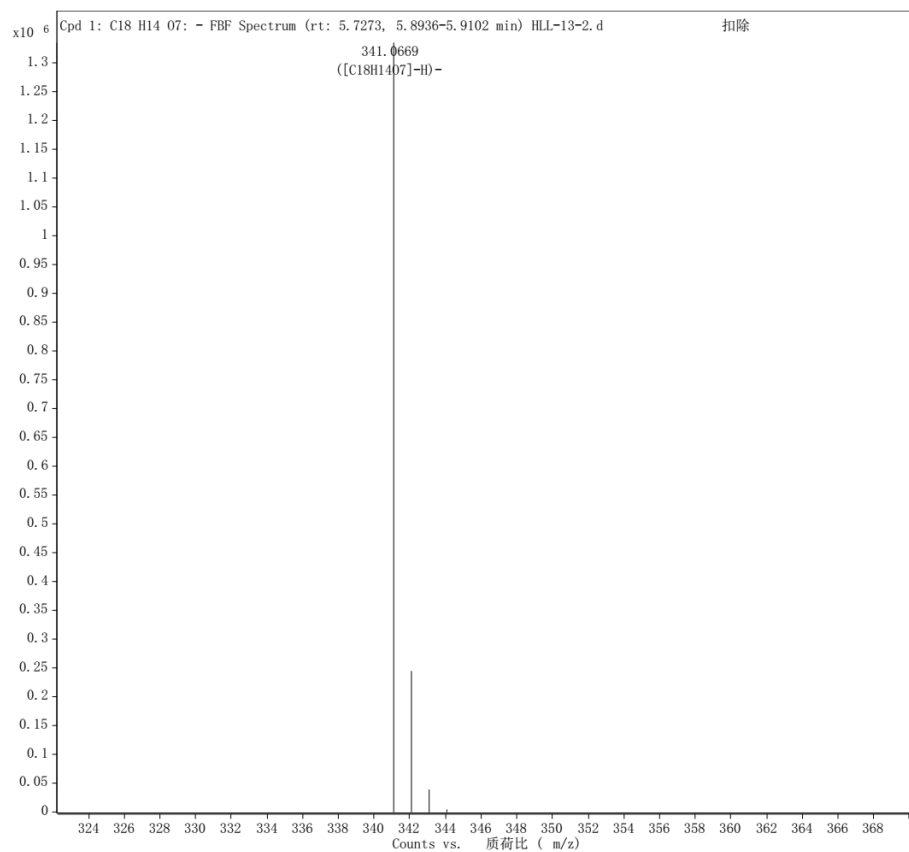

**Figure S13** The HR-ESI-MS spectrum of **11**
